# Supplementary material
Source: bioRxiv or medRxiv preprint supplement (https://www.biorxiv.org/highwire/filestream/139468/field_highwire_adjunct_files/0/452748-1.zip)

A

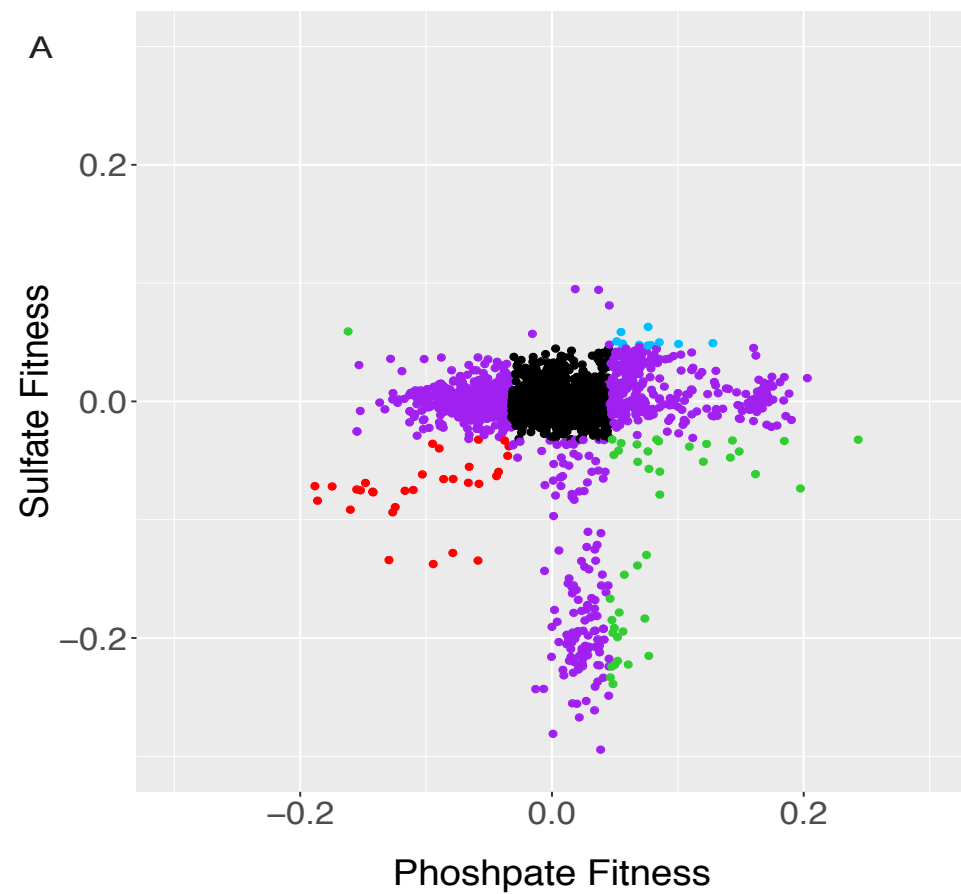

B

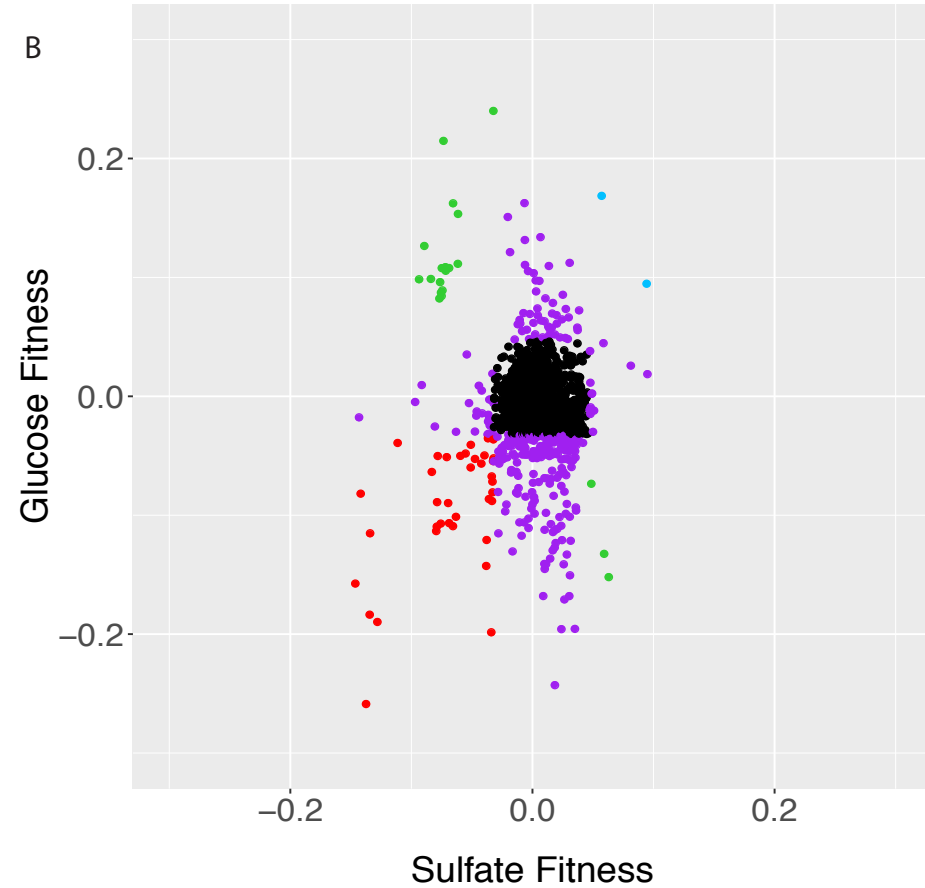

Supplement: Supplementary file [file 452748-1.zip]
